# Supplementary material for: Organic soils can be CO 2 sinks in both drained and undrained hemiboreal peatland forests
Source: Copernicus journal article supplement (doi:10.5194/bg-22-4627-2025), 2025-09-15
Supplement: Supplementary file 1 [file bg-22-4627-2025-supplement.pdf]

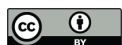

## *Supplement of*

# **Organic soils can be CO<sub>2</sub> sinks in both drained and undrained hemiboreal peatland forests**

**Aldis Butlers et al.**

*Correspondence to:* Aldis Butlers ([aldis.butlers@silava.lv](mailto:aldis.butlers@silava.lv))

The copyright of individual parts of the supplement might differ from the article licence.

## 891 S1. Supplementary text

### 892 S1.1. Soil heterotrophic respiration interpretation issues

#### 893 S1.1.1. Soil heterotrophic respiration measurements

894 Heterotrophic soil respiration ( $R_{het}$ ) was measured by applying the manual closed dynamic dark chamber method (Denmead,  
895 2008; Hutchinson and Livingston, 1993). For each measurement, a 60 x 90 cm (W x L) trenched (Ngao et al., 2007) locations  
896 was prepared at the end of the previous year's growing season to a depth of at least 40 cm, using geotextile on the sides to  
897 prevent root ingrowth and by removing alive vegetation and litter layer. In each subplot, measurements were done in 3  
898 replicates, in total, nine measurement locations in each study site.  $CO_2$  flux monitoring was made by EGM5 portable  $CO_2$  gas  
899 analyser (PP Systems, Amesbury, MA, USA) and a fan-equipped chamber (area 0.07 m<sup>2</sup>, volume 0.017 m<sup>3</sup>) placed in the  
900 centre of the trenched surface without using a collar. The measurement data was stored at a 1 Hz frequency over a three-minute  
901 period in each measurement.  $R_{het}$  measurements were made in parallel with  $R_{tot}$  measurements. Between the measurement  
902 campaigns,  $R_{het}$  measurement areas were covered with geotextile, which was covered with an equivalent quantity of debris  
903 and litter as nearby soil, aiming to simulate natural conditions.

904 Before flux calculations, the first 15 seconds of the measurement data were discarded to avoid potential error in the results due  
905 to the placing of the chamber in the soil. To estimate the slope of the linear regression equation representing  $CO_2$  concentration  
906 change in time, the same approach as for  $R_{tot}$  was used (1).

#### 907 S1.1.2. Identification of $R_{het}$ overestimation

908 We observed an inconsistency between  $R_{het}$  and  $R_{tot}$ , as direct comparison showed that  $R_{het}$  (mean 13.0 t  $CO_2$ -C ha<sup>-1</sup> year<sup>-1</sup>)  
909 exceeded  $R_{tot}$  by an average of  $5.8 \pm 3.1$  t  $CO_2$ -C ha<sup>-1</sup> year<sup>-1</sup>. The difference is evident in the observed relationship between  
910  $R_{het}$  or  $R_{tot}$  and temperature, indicating higher  $R_{het}$  emissions at the same temperatures (Figure S9).  $R_{het}$  should not be  
911 greater than  $R_{tot}$ , as  $R_{tot}$  includes both  $R_{het}$  and autotrophic respiration of plants.

912 The main errors in  $R_{het}$  and  $R_{tot}$  measurements can be introduced during gas sampling and analysis (instrumental method),  
913 by site preparation (e.g., collar installation or trenching), or by site-specific factors. To identify the reason for the discrepancy  
914 between  $R_{tot}$  and  $R_{het}$ , we undertook several steps, including investigating the comparability of the instrumental methods and  
915 analysing potential sources of error.

916 In some studies, it has been observed that flux can be underestimated due to nonlinearity in gas concentration increase generally  
917 caused by either the small chamber volume or by extended measurement periods (Kutzbach et al., 2007; Nakano et al., 2004;  
918 Nomura et al., 2019). Therefore, we assessed method comparability and concentration increase linearity in two steps: 1) by  
919 initial quality assurance procedure; 2) by quality control during flux calculation, we checked the linearity of each flux  
920 measurement, both visually and using  $R^2$  as an indicator:

- 921 1) First, we ensured that the instrumental methods were comparable and investigated whether the discrepancy was due  
922 to  $R_{tot}$  underestimation. To compare the methods, we conducted a quality assurance procedure designed to eliminate  
923 the influence of site-related factors. Both instrumental methods were therefore compared under controlled conditions.  
924 In the laboratory, under constant organic soil temperature (17 °C) and moisture (50 %) conditions characteristic of  
925 natural soil conditions in a warm season, we simultaneously collected gas samples in glass vials from the  $R_{tot}$   
926 measurement chamber for  $CO_2$  concentration analysis with a gas chromatograph, while also measuring changes in  
927  $CO_2$  concentration using a portable gas analyser employed in the  $R_{het}$  measurements. Repeated measurements ( $n = 6$ )  
928 revealed that the gas concentration changes in the chamber remained linear throughout the 30-minute measurement  
929 period. The relative standard deviation for flux measurements using a gas collection in glass vials and testing with a  
930 gas chromatograph was 10%, while with the portable gas analyser, it was 6%. The gas fluxes obtained by the portable

analyser were, on average,  $10 \pm 7\%$  lower. Consequently, the procedure shows that  $R_{tot}$  measurements could be subject to relative overestimation; however, considering the differences in measurement accuracy and precision, these differences are not significant. Hence, the comparability demonstrated alongside the observed linearity of gas concentration changes in the  $R_{tot}$  chamber, showed that both instrumental methods are comparable and excluded the possibility of  $R_{tot}$  underestimation due to longer measurement times. The nonlinearity can be induced by increasing pressure inside the chamber over time (Silva et al., 2015), consequently, this phenomenon may be more pronounced when using chambers with a small volume. For this reason, it has been advised to use small chambers to emphasize nonlinearity (Kutzbach et al., 2007). Likely, we did not identify nonlinearity as a cause for potential  $R_{tot}$  underestimation in our study due to the relatively large chambers used (area  $0.196 \text{ m}^2$ , volume  $0.0655 \text{ m}^3$ ). Nevertheless, it has been also advised that linearity itself should not be regarded as an indicator of measurement accuracy (Nakano et al., 2004).

- 2) During flux calculation, linear regression was applied to establish a relationship between  $\text{CO}_2$  concentrations and the elapsed time since chamber closure for each measurement. The data was then screened to identify deviations from the expected trend, with erroneous measurements being removed. We used a regression coefficient of determination ( $R^2$ ) of 0.9 ( $p < 0.01$ ) as a quality threshold, except in cases where the difference between the highest and lowest measured  $\text{CO}_2$  concentrations in the chamber was less than the method's uncertainty of 20 ppm. Since an insignificant amount of data was discarded during this process, it reaffirmed that nonlinearity was not a concern, both during the quality assurance procedure and throughout the entire study. However, there is some disagreement regarding the use of  $R^2$  as an indicator for identifying linearity. Recommendations exist against using  $R^2$  as an indicator (Kutzbach et al., 2007), however, these suggestions apply to continuous measurements, where the large volume of field measurement data can indeed lead to false indications of good linearity. In such cases, nonlinear regressions may be appropriate (Kutzbach et al., 2007; Nakano et al., 2004). In cases, such as ours, involving manual chamber usage with a limited number of measurements, nonlinear regression can lead to overfitting an unsuitable trend, making linear regression a safer option. For these reasons nonlinear regression is not recommended for  $R_{tot}$  measurements, as plant responses can be highly variable and unpredictable (Kutzbach et al., 2007). Therefore, we consider our flux estimation approach well suited for this context, as it incorporates rigorous quality control measures to ensure accuracy and reliability in the results.

To summarize, quality assurance demonstrated that nonlinearity was not a concern, while quality control validated the reliability of individual measurements. A comprehensive evaluation of these assessments led to the conclusion that  $R_{het}$  measurements exceeding  $R_{tot}$  measurements were not because of underestimation of  $R_{tot}$ , but rather due to an overestimation of  $R_{het}$ .

### **S1.1.3. Sources of $R_{het}$ overestimation and reduced precision**

In investigating the causes of errors in  $R_{het}$  measurements, we identified the main sources of accuracy errors that led to overestimation, as well as factors that led to additional precision errors, further increasing measurement uncertainty. Both types of errors were introduced by the trenching and the approach used to simulate natural conditions between measurements by covering the trenched area with geotextile, topped with a litter layer:

- 1) To investigate the impact of geotextile cover removal, we compared  $R_{het}$  measurements taken immediately after removing the geotextile with those taken one hour later. We observed that, on average, the results were lower by a factor of  $1.6 \pm 1.1$  after one hour, with a range of variation between 0.79 and 1.8. This means that the textile reduced the rate of  $\text{CO}_2$  diffusion from soil to air, and the textile should have been removed well before the onset of the measurements.
- 2) Soil trenching was conducted before winter, killing the roots within the trenched area. By spring, when measurements began, the cut roots decomposition was reflected in  $R_{het}$  measurements. To assess the potential impact of the cut

roots, we collected total belowground biomass samples from the top 40 cm of soil using a soil probe and found that the total root biomass in drained and undrained sites was, on average,  $39.3 \pm 11.1$  and  $52.7 \pm 18.7$  t ha<sup>-1</sup>, respectively. Considering that around 50% of roots can decompose over two years (Moore et al., 1999; Straková et al., 2012), the study period's underground biomass decomposition could have led to a significant artificial increase in measured Rhet of drained ( $11.67$  t CO<sub>2</sub>-C ha<sup>-1</sup> year<sup>-1</sup>) and undrained ( $14.37$  t CO<sub>2</sub>-C ha<sup>-1</sup> year<sup>-1</sup>) soils. Specifically, the decomposition of resulted killed roots may have raised the Rhet value by 4.90 and 6.59 t CO<sub>2</sub>-C ha<sup>-1</sup> year<sup>-1</sup>, respectively. Although this estimation is rough, it quite well illustrates the potential overestimation generated by root decomposition, especially since the measured Rhet in the study exceeded the Rtot by an average of  $5.8 \pm 3.1$  t CO<sub>2</sub>-C ha<sup>-1</sup> year<sup>-1</sup>.

- 3) Additional challenges in Rhet interpretation arose due to altered soil conditions caused by trenching, as indicated by the reduced correlation between Rhet and soil temperature. The reduced correlation points towards that further errors in Rhet measurements were introduced by the effects of trenching on soil temperature and, consequently, likely also on moisture levels, in spite of the use of the geotextile cover. Reduced correlation shows that the temperature readings, taken at the centre of the subplot in the untrenched area, did not accurately reflect the temperature within the trenched sections. The correlation (*r*) between soil temperature and Rhet ranged from a mean of  $0.28 \pm 0.12$  to  $0.51 \pm 0.12$ . This was significantly lower than the correlation found with Rtot (*r*=0.86), thus indicating altered soil conditions in the trenched areas. The correlation between temperature and flux should be comparable for both Rhet and Rtot since both root and microbial respiration are temperature-dependent (Davidson and Janssens, 2006). Furthermore, correlation with Rhet can be expected to be even stronger than with Rtot, as the correlation with Rtot is reduced by the variability in autotrophic respiration (Kutzbach et al., 2007). In our case, the reduced Rhet correlation seems to be generally caused by high emission outliers at elevated soil temperatures. These outliers lead to considerable overestimation of Rhet by flux interpolation models, which are constrained to predict reduced emissions at increased temperatures when soil moisture conditions do not favour microbial activity (Khomik et al., 2009; Yueqian, 2020). Soil respiration is influenced not only by soil temperature but also by water availability (Davidson and Janssens, 2006). Not accounting for moisture regime in the interpolation of flux measurement results can lead to overestimation as Rhet prediction models have to be available to predict lower emissions at even increased temperatures if soil moisture is limiting microbial activity (Jovani-Sancho et al., 2018; Liaw et al., 2021). As the soil temperature and moisture were measured in undisturbed areas of the site, our study design did not account for potential differences in environmental parameters, such as soil temperature and moisture, between trenched and untrenched areas. Therefore, we were unable to address the issue empirically, and the temperature measurements were not applicable to Rhet measurements, preventing both data correction and interpolation. Trenching-altered soil conditions (Ojanen et al., 2012) is a well-known source of Rhet measurement error (Chin et al., 2023; Comstedt et al., 2011; Díaz-Pinés et al., 2010; Epron, 2010; Ngao et al., 2007; Ryhti et al., 2021; Savage et al., 2018; Subke et al., 2006). Due to the challenges in overcoming Rhet measurement errors, root exclusion methods, including trenching, are not entirely satisfactory. As a result, the reliability of using these methods to accurately measure Rhet remains questionable. Given the questionable accuracy and precision in quantifying soil heterotrophic respiration, total soil respiration (Rtot) or soil respiration (Rs) should be considered as an alternative proxy for evaluating soil CO<sub>2</sub> emissions. Rtot and Rs, by causing less soil disturbance, provide more reliable measurement results. Moreover, using these results for relative comparisons, which are necessary for investigating the impact of anthropogenic emissions and management practices on emissions, helps mitigate biases introduced by autotrophic respiration, particularly in cases where biomass is similar across the compared sites.

Considering the significant impacts formed by time from trenching prior to monitoring period and timing of geotextile removal during measurements on the overestimation of Rhet, the primary cause of overestimation could not be definitively identified. The general overestimation likely resulted from the cumulative effects of root decomposition and the CO<sub>2</sub> flux surge following

geotextile removal at the start of flux measurements. Attempts to correct these effects would introduce substantial uncertainties. Due to the combined influences of these factors, which cannot be separately isolated, and the observed high variability in overestimation, no robust empirical correction could be applied to obtain instantaneous Rhet values, that could be reliably used for Rhet interpolation. Furthermore, the ability to perform proper interpolation was reduced due to the unavailability of temperature measurements in the trenched areas, further hindering reliable flux annualization and subsequent soil CO<sub>2</sub> balance estimation. Thus, we concluded that a more reliable soil CO<sub>2</sub> balance result was achieved by empirically recalculating Rtot to Rhet. This approach introduced only one additional uncertainty related to the Rtot-to-Rhet conversion, estimated to be approximately 0.32 t CO<sub>2</sub>-C ha<sup>-1</sup> year<sup>-1</sup>, based on the RMSE of the applied conversion model. In comparison, using direct Rhet measurements for soil CO<sub>2</sub> balance estimation would introduce at least seven additional sources of uncertainty. These include root biomass in the trenched area, geotextile removal correction, turnover rates of trenched roots, ground vegetation, tree fine roots, and foliar litter. Further uncertainty would be compounded by the error introduced from using temperature measurements from the untrenched area for Rhet interpolation, as these did not accurately represent the temperature at the trenched site.

#### 1031 **S1.1.4. Summary and conclusions**

Based on the quality procedures performed, we concluded that the instrumental methods were not responsible for the discrepancy between Rhet and Rtot results. Furthermore, the quality assurance procedure suggested that Rtot was more likely to be potentially slightly overestimated rather than underestimated. We found sufficient evidence of errors, including overestimation, in the Rhet results to support the conclusion that using the Rtot-to-Rhet conversion approach was a more reliable method for annual soil carbon balance estimation. Similar Rhet interpretation issues have been acknowledged by previous studies (Ngao et al., 2007; Epron, 2010; Savage et al., 2018; Chin et al., 2023).

Given the complexity and uncertainty of the Rhet overestimation found, reasonable data corrections were not possible, and thus, using the measured Rhet in CO<sub>2</sub> balance estimation would have resulted in highly unreliable outcomes. The experience emphasizes the necessity of measuring root biomass, stratified by root diameters or branching orders, and conducting a proper root decomposition study to account for the decomposition of killed roots to enable correction of the measured Rhet for CO<sub>2</sub> emissions from trenched root decomposition. It is crucial to perform simultaneous Rtot or Rs measurements in untrenched soil alongside Rhet measurements, as well as soil temperature and moisture measurements at both locations. Since root decomposition is the main concern, the trenching method may be more challenging in regions with increased biomass growth.

#### 1045 **S1.2. Country as a CO<sub>2</sub> balance impacting factor**

The mean measured Rtot of undrained soil was smaller in both Latvia (mean 57±6 mg CO<sub>2</sub>-C m<sup>-2</sup> h<sup>-1</sup>) and Lithuania (mean 55±6 mg CO<sub>2</sub>-C m<sup>-2</sup> h<sup>-1</sup>) compared to Rtot from drained soil in the Baltic states ranging from mean 72±4 to 79±5 mg CO<sub>2</sub>-C m<sup>-2</sup> h<sup>-1</sup> (Figure S4, g). Estimated annualized Rtot from neither drained sites (overall mean 6.21±0.43 t CO<sub>2</sub>-C ha<sup>-1</sup> year<sup>-1</sup>) nor undrained sites (overall mean 4.38±1.20 t CO<sub>2</sub>-C ha<sup>-1</sup> year<sup>-1</sup>) differed significantly between countries and were generally higher from drained soils (Figure 6, h). Soil CO<sub>2</sub> balance estimates showed higher mean soil CO<sub>2</sub> removals for both drained and undrained sites in Lithuania than those in Estonia and Latvia. This was primarily attributed to greater CO<sub>2</sub> influx from ground vegetation litter (Figure 8). However, the sites in Lithuania also stand out due to greater uncertainty in both CO<sub>2</sub> influx and efflux, resulting in the soil CO<sub>2</sub> balance in drained sites across the countries being equivalent within the margin of error (Figure 9a). The low number of undrained sites in Lithuania (n=2) limited the ability to investigate the patterns behind the observed lower soil CO<sub>2</sub> efflux and higher aGV litter, contributing to significantly higher soil CO<sub>2</sub> removals (+3.70±0.11 t CO<sub>2</sub>-C ha<sup>-1</sup> year<sup>-1</sup>) compared to sites in Latvia (+0.30±0.56 t CO<sub>2</sub>-C ha<sup>-1</sup> year<sup>-1</sup>, n=5).

1059 **Table S1: Study stands characteristics.** Abbreviations: species – dominant tree species; WTL – mean water table level, cm; A – age, years;  
1060 D – mean tree diameter, cm; H – mean tree height, m; BA – basal area, m<sup>2</sup> ha<sup>-1</sup>. Site types: Dr - *Dryopterioso-caricosa*; Ox - *Oxalidosa turf.*  
1061 *mel.*; My - *Myrtillosa turf.mel.*

| Site identifier | Latitude | Longitude | Species | Site type | WTL  | Organic layer, cm | A   | D  | H  | BA |
|-----------------|----------|-----------|---------|-----------|------|-------------------|-----|----|----|----|
| Drained sites   |          |           |         |           |      |                   |     |    |    |    |
| LTC106          | 54.79312 | 24.07451  | Alder   | Ox        | −56  | 50                | 30  | 12 | 13 | 26 |
| EEC108          | 58.25010 | 26.29040  |         | Ox        | −23  | 35                | 80  | 21 | 20 | 36 |
| LVC108          | 57.32216 | 26.06411  | Birch   | Ox        | −30  | 90                | 24  | 14 | 16 | 15 |
| LVC115          | 56.69388 | 25.68767  |         | Ox        | −96  | 56                | 33  | 13 | 16 | 21 |
| EEC106          | 58.43755 | 26.35558  |         | Ox        | −70  | 70                | 35  | 12 | 13 | 18 |
| LTC105          | 54.79010 | 24.08022  |         | Ox        | −94  | 50                | 43  | 22 | 18 | 23 |
| EEC109          | 58.34765 | 26.47599  |         | Ox        | −57  | 90                | 45  | 16 | 16 | 22 |
| EEC105          | 58.42870 | 26.37470  | Pine    | My        | −82  | 90                | 60  | 22 | 18 | 17 |
| LVC110          | 56.62838 | 24.11370  |         | My        | −76  | 35                | 81  | 12 | 12 | 43 |
| LVC107          | 56.78452 | 23.86247  |         | Ox        | −112 | 27                | 101 | 22 | 21 | 48 |
| LVC116          | 57.26889 | 25.99285  |         | My        | −31  | 165               | 141 | 14 | 14 | 34 |
| LVC313          | 57.26889 | 25.99285  |         | My        | −53  | 138               | 141 | 14 | 13 | 39 |
| LVC104          | 56.99978 | 24.65896  | Spruce  | Ox        | −80  | 50                | 40  | 22 | 20 | 33 |
| LVC105          | 56.39288 | 25.65370  |         | Ox        | −31  | 86                | 55  | 22 | 19 | 22 |
| LVC106          | 56.39495 | 25.65134  |         | Ox        | −42  | 95                | 55  | 24 | 21 | 21 |
| EEC104          | 58.43861 | 26.35394  |         | Ox        | −66  | 80                | 60  | 20 | 17 | 18 |
| LTC104          | 54.79426 | 24.08077  |         | My        | −63  | 50                | 70  | 20 | 17 | 27 |
| LVC308          | 57.34717 | 25.92568  |         | Ox        | −50  | 212               | 141 | 25 | 23 | 36 |
| LVC112          | 57.33731 | 26.02635  |         | Ox        | −31  | 68                | 162 | 10 | 10 | 21 |
| Undrained sites |          |           |         |           |      |                   |     |    |    |    |
| LTC109          | 54.54109 | 23.61140  | Alder   | Dr        | −10  | 150               | 44  | 16 | 16 | 30 |
| LVC109          | 56.57378 | 24.82944  |         | Dr        | −11  | 100               | 74  | 28 | 28 | 36 |
| LTC108          | 54.54396 | 23.56578  | Birch   | Dr        | −7   | 150               | 44  | 21 | 20 | 22 |
| LVC111          | 57.29058 | 25.99874  |         | Dr        | −14  | 230               | 61  | 8  | 9  | 23 |
| LVC309          | 57.27915 | 25.85371  | Spruce  | Dr        | −17  | 133               | 81  | 21 | 20 | 34 |
| LVC311          | 57.27887 | 25.85441  |         | Dr        | −13  | 205               | 88  | 18 | 17 | 42 |
| LVC312          | 57.31164 | 25.93609  |         | Dr        | −17  | 221               | 96  | 17 | 15 | 25 |

1062

1063

1064 **Table S2: Relative occurrence and mean projective cover of most common ground vegetation species in the study sites.** The species  
1065 are listed in descending order based on a score calculated as the sum of their cover and occurrence.

| Drained                    |       |            | Undrained                    |       |            |
|----------------------------|-------|------------|------------------------------|-------|------------|
| Species                    | Cover | Occurrence | Species                      | Cover | Occurrence |
| Shrub layer                |       |            |                              |       |            |
| Picea abies                | 35    | 20         | Picea abies                  | 19    | 19         |
| Frangula alnus             | 21    | 16         | Salix sp.                    | 13    | 29         |
| Fraxinus excelsior         | 28    | 7          | Alnus glutinosa              | 11    | 24         |
| Betula pendula             | 14    | 20         | Sorbus aucuparia             | 11    | 14         |
| Salix sp.                  | 23    | 9          | Populus tremula              | 10    | 10         |
| Sorbus aucuparia           | 12    | 18         | Betula pendula               | 5     | 5          |
| Viburnum opulus            | 20    | 9          | -                            | -     | -          |
| Prunus padus               | 18    | 7          | -                            | -     | -          |
| Populus tremula            | 20    | 2          | -                            | -     | -          |
| Herbaceous layer           |       |            |                              |       |            |
| Oxalis acetosella          | 20    | 54         | Epilobium hirsutum           | 39    | 23         |
| Rubus idaeus               | 17    | 50         | Epilobium parviflorum        | 18    | 39         |
| Carex echinata             | 53    | 2          | Galium palustre              | 12    | 44         |
| Vaccinium myrtillus        | 18    | 36         | Cirsium oleraceum            | 29    | 14         |
| Urtica dioica              | 17    | 28         | Deschampsia cespitosa        | 21    | 22         |
| Stellaria nemorum          | 18    | 26         | Filipendula ulmaria          | 20    | 23         |
| Dryopteris carthusiana     | 8     | 29         | Carex cinerea                | 24    | 16         |
| Mycelis muralis            | 3     | 30         | Rubus idaeus                 | 15    | 24         |
| Poa angustifolia           | 28    | 3          | Athyrium filix-femina        | 16    | 22         |
| Carex remota               | 25    | 5          | Carex sp.                    | 12    | 26         |
| Geranium robertianum       | 6     | 22         | Oxalis acetosella            | 3     | 32         |
| Mercurialis perennis       | 26    | 2          | Salix sp.                    | 10    | 23         |
| Vaccinium vitis-idaea      | 10    | 15         | Chamaenerion angustifolium   | 30    | 2          |
| Cirsium oleraceum          | 20    | 5          | Galium uliginosum            | 30    | 1          |
| Carex cespitosa            | 18    | 5          | Dryopteris carthusiana       | 5     | 26         |
| Trientalis europaea        | 2     | 21         | Chrysosplenium alternifolium | 4     | 26         |
| Calamagrostis arundinacea  | 17    | 6          | Scirpus sylvaticus           | 25    | 4          |
| Galeopsis tetrahit         | 4     | 19         | Luzula pilosa                | 9     | 20         |
| Phragmites australis       | 19    | 3          | Carex vesicaria              | 25    | 1          |
| Betula pendula             | 9     | 12         | Urtica dioica                | 7     | 18         |
| Viburnum opulus            | 20    | 1          | Stellaria nemorum            | 8     | 17         |
| Moss and lichen layer      |       |            |                              |       |            |
| Hylocomium splendens       | 34    | 45         | Hylocomium splendens         | 14    | 30         |
| Plagiomnium cuspidatum     | 16    | 38         | Eurhynchium hians            | 17    | 26         |
| Pleurozium schreberi       | 18    | 35         | Climacium dendroides         | 10    | 26         |
| Polytrichum commune        | 40    | 1          | Rhytidiadelphus triquetrus   | 10    | 25         |
| Eurhynchium angustirete    | 13    | 24         | Plagiomnium cuspidatum       | 4     | 23         |
| Plagiomnium affine         | 5     | 27         | Cirriphyllum piliferum       | 7     | 19         |
| Rhytidiadelphus triquetrus | 10    | 16         | Plagiomnium affine           | 3     | 22         |
| Dicranum polysetum         | 3     | 24         | Pleurozium schreberi         | 5     | 19         |
| Brachythecium rutabulum    | 20    | 2          | Dicranum scoparium           | 4     | 14         |
| Dicranum scoparium         | 2     | 20         | Polytrichum juniperinum      | 9     | 8          |
| Cirriphyllum piliferum     | 14    | 7          | Eurhynchium striatum         | 10    | 4          |
| Ptilium crista-castrensis  | 20    | 1          | Thuidium tamariscinum        | 5     | 9          |

1068  
1069

**Table S3: Meteorological conditions during the study period** (Estonian Environment Agency. Climate normals, 2024; Latvian Environment, Geology and Meteorology Centre. Climate normals, 2024; Lithuanian Hydrometeorological Service. Climate normals, 2024)

| Parameter                  | Variable                      | Estonia              |                      | Latvia               |                      | Lithuania            |                      |
|----------------------------|-------------------------------|----------------------|----------------------|----------------------|----------------------|----------------------|----------------------|
|                            |                               | 1 <sup>st</sup> year | 2 <sup>nd</sup> year | 1 <sup>st</sup> year | 2 <sup>nd</sup> year | 1 <sup>st</sup> year | 2 <sup>nd</sup> year |
| Annual air temperature. °C | Mean                          | 6.4                  | 6.9                  | 7.0                  | 7.3                  | 7.8                  | 8.5                  |
|                            | Range                         | -22.4...27.2         | -14.9, 25.6          | -31.0, 33.7          | -23.2, 33.7          | -12.0, 27.2          | -11.3, 25.0          |
|                            | Climate normal <sup>(1)</sup> | 6.4                  |                      | 6.8                  |                      | 7.4                  |                      |
| Annual precipitation. mm   | Sum                           | 597.0                | 472.9                | 676.3                | 685.8                | 639.8                | 533.6                |
|                            | Climate normal <sup>(1)</sup> | 662                  |                      | 686                  |                      | 695                  |                      |

<sup>(1)</sup> 30-year averages for climate variables

1072

**Table S4: Laboratory standard methods used for sample analysis.**

| Parameter                                                                                                | Unit               | Method principle                                        | Standard method           |
|----------------------------------------------------------------------------------------------------------|--------------------|---------------------------------------------------------|---------------------------|
| Analysis of soil and biomass samples                                                                     |                    |                                                         |                           |
| Bulk density                                                                                             | kg m <sup>-3</sup> | Gravimetry                                              | LVS ISO 11272:2017        |
| pH                                                                                                       | unit               | Potentiometry                                           | LVS ISO 10390:2021        |
| Total C                                                                                                  | g kg <sup>-1</sup> | Elementary analysis (dry combustion)                    | LVS ISO 10694:2006        |
| Total N                                                                                                  | g kg <sup>-1</sup> | Elementary analysis (dry combustion)                    | LVS ISO 13878:1998        |
| Ash content                                                                                              | g kg <sup>-1</sup> | Gravimetry                                              | LVS EN ISO 10693:2014     |
| Concentrated HNO <sub>3</sub> extractable potassium (K), calcium (Ca), magnesium (Mg) and phosphorus (P) | g kg <sup>-1</sup> | ICP-OES                                                 | LVS EN ISO 11885:2009     |
| Analysis of water samples                                                                                |                    |                                                         |                           |
| pH                                                                                                       | unit               | Potentiometry                                           | LVS EN ISO 10523:2012     |
| DOC                                                                                                      | mg L <sup>-1</sup> | Catalytical combustion with infrared detection          | LVS EN 1484:2000          |
| Total N                                                                                                  | mg L <sup>-1</sup> | Catalytical combustion with chemiluminescence detection | LVS EN 1484:2000          |
| NO <sub>3</sub> <sup>-</sup> , PO <sub>4</sub> <sup>3-</sup>                                             | mg L <sup>-1</sup> | Ion chromatography                                      | LVS EN ISO 10304 – 1:2009 |
| NH <sub>4</sub> <sup>+</sup>                                                                             | mg L <sup>-1</sup> | Photometry                                              | LVS ISO 7150-1:1984       |
| K, Ca, Mg                                                                                                | mg L <sup>-1</sup> | Flame atomic absorption spectrometry                    | LVS EN ISO 7980:2000      |

1074



1075 **Table S5: Biomass (t dm. ha<sup>-1</sup>) measurement results (mean±SD) stratified by drainage status and country.** Abbreviations: aGV and  
1076 bGV – aboveground and belowground biomass of herbaceous ground vegetation, respectively, S – shrubs, FR- fine roots, FRP – fine root  
1077 production, M – moss, MP – moss production, fLF – foliar fine litter, cLF – coarse woody litter, RB – total root biomass in depth 0-40 cm.  
1078 NE – not estimated. \*Data used for soil CO<sub>2</sub> balance estimation, \*\* assuming 100% moss cover.

| Category | Drained   |           |           | Undrained  |           |
|----------|-----------|-----------|-----------|------------|-----------|
|          | EE        | LT        | LV        | LT         | LV        |
| aGV*     | 0.79±0.33 | 1.34±2.98 | 2.38±0.63 | 4.64±14.53 | 1.44±0.63 |
| bGV*     | NE        | 4.24±2.01 | 2.52±0.96 | 2.3±7.74   | 2.47±1.26 |
| S        | 0.36±0.36 | 2.04±2.42 | NE        | 4.27±24.24 | NE        |
| FR       | NE        | NE        | NE        | NE         | NE        |
| FRP*     | NE        | 2.51±5.35 | 2.54±1.02 | NE         | 1.08±0.76 |
| M**      | 4.8±2.49  | NE        | NE        | NE         | NE        |
| MP**     | 0.92±0.48 | NE        | 0.87±0.32 | NE         | 1.01±0.31 |
| fLF*     | 3.66±0.64 | 3.7±1.2   | 2.9±0.69  | 3.28±13.77 | 2.23±1.23 |
| cLF      | 1.39±0.65 | 0.33±0.62 | 0.54±0.26 | 1.35±6.61  | 0.55±0.68 |
| RB       | NE        | NE        | 39.3±11.1 | NE         | 52.7±18.7 |

1079 **Table S6: Characteristics of total soil respiration (R<sub>tot</sub>) prediction models used for interpolation of Box-Cox transformed hourly**  
1080 **emissions.** Abbreviations: R10 - R<sub>tot</sub> when soil temperature is 10 °C at 10 cm depth, RMSE – root mean square error of the model prediction.  
1081 RMSE improvement and R10 increase are relative differences of corresponding model characteristics compared to linear models fitted using  
1082 log10 transformed data. Model describes:  $\frac{R_{tot}^{\lambda-1}}{\lambda} = a * T + b$ . where:

1084 R<sub>tot</sub> – soil instantaneous total respiration (mg CO<sub>2</sub>-C m<sup>-2</sup> h<sup>-1</sup>), lambda – lambda value used for R<sub>tot</sub> data transformation, a – coefficient a of  
1085 linear model, b – coefficient b of a linear model, T – soil temperature at 10 cm depth (°C).

| Site identifier | Coefficient a | Coefficient b | R <sup>2</sup> | R10 | RMSE | RMSE improvement | R10 increase |
|-----------------|---------------|---------------|----------------|-----|------|------------------|--------------|
| LVC104          | 0.4903        | 5.6964        | 0.71           | 89  | 35   | 7%               | 10%          |
| LVC105          | 0.74315       | 4.44323       | 0.84           | 116 | 59   | 8%               | 19%          |
| LVC106          | 0.7318        | 5.0111        | 0.85           | 127 | 59   | 14%              | 20%          |
| LVC107          | 0.53295       | 4.32402       | 0.70           | 72  | 36   | 6%               | 10%          |
| LVC108          | 0.70835       | 3.45753       | 0.78           | 88  | 45   | 20%              | 26%          |
| LVC109          | 0.68144       | 3.27991       | 0.80           | 80  | 43   | 34%              | 24%          |
| LVC110          | 0.60544       | 3.41507       | 0.72           | 69  | 31   | 11%              | 15%          |
| LVC111          | 0.70313       | 2.31005       | 0.78           | 67  | 31   | 7%               | 28%          |
| LVC112          | 0.6929        | 3.341         | 0.84           | 83  | 24   | 43%              | 12%          |
| LVC115          | 0.61712       | 4.19065       | 0.75           | 85  | 38   | 25%              | 17%          |
| LVC116          | 0.6038        | 3.5911        | 0.77           | 72  | 21   | 31%              | 12%          |
| LVC308          | 0.65977       | 3.86443       | 0.82           | 87  | 23   | 38%              | 14%          |
| LVC309          | 0.5781        | 2.4058        | 0.74           | 50  | 24   | 40%              | 30%          |
| LVC311          | 0.5456        | 3.1613        | 0.63           | 56  | 31   | 6%               | 29%          |
| LVC312          | 0.6539        | 2.1481        | 0.73           | 57  | 33   | -11%             | 35%          |
| LVC313          | 0.52151       | 4.277         | 0.80           | 69  | 17   | 25%              | 6%           |
| EEC108          | 0.59162       | 3.17106       | 0.82           | 63  | 25   | 27%              | 19%          |
| EEC106          | 0.5715        | 4.2928        | 0.82           | 78  | 37   | 32%              | 20%          |
| EEC105          | 0.44359       | 4.60199       | 0.75           | 62  | 32   | 20%              | 15%          |
| EEC104          | 0.55427       | 4.47956       | 0.72           | 78  | 53   | 14%              | 20%          |
| EEC109          | 0.499         | 5.732         | 0.63           | 92  | 52   | 6%               | 26%          |
| LTC104          | 0.35744       | 4.25538       | 0.46           | 46  | 38   | 5%               | 17%          |
| LTC105          | 0.4589        | 5.07975       | 0.52           | 72  | 54   | 6%               | 15%          |
| LTC106          | 0.5431        | 4.8996        | 0.54           | 84  | 68   | 7%               | 22%          |
| LTC108          | 0.28306       | 4.04885       | 0.39           | 35  | 26   | 3%               | 28%          |
| LTC109          | 0.36444       | 4.24811       | 0.43           | 46  | 44   | -4%              | 36%          |

1087

1088

**Table S7: Summary of soil characteristics in 0-30 cm depth in study sites (mean±SD).** BD - bulk density, Corg – organic carbon, N – Nitrogen, C:N – C:N ratio, P – phosphorous, K – potassium, Ca – calcium, Mg – magnesium.

| Parameter | Unit               | Drained |         |         | Undrained |         |         |
|-----------|--------------------|---------|---------|---------|-----------|---------|---------|
|           |                    | 0-10    | 0-20    | 0-30    | 0-10      | 0-20    | 0-30    |
| BD        | kg m <sup>-3</sup> | 221±86  | 270±135 | 314±214 | 173±38    | 174±32  | 168±32  |
| pH        | units              | 3.9±1.1 | 4.1±1.1 | 4.2±1.1 | 5.3±0.3   | 5.3±0.3 | 5.3±0.3 |
| Corg      | g kg <sup>-1</sup> | 412±91  | 416±121 | 406±153 | 411±64    | 432±39  | 443±39  |
| N         | g kg <sup>-1</sup> | 23±6    | 22±8    | 20±9    | 27±4      | 27±4    | 27±4    |
| C:N       | ratio              | 19±6    | 21±6    | 22±7    | 15±3      | 16±3    | 17±3    |
| P         | g kg <sup>-1</sup> | 0.9±0.4 | 0.8±0.5 | 0.8±0.6 | 2±1.7     | 1.8±1.2 | 1.6±1.1 |
| K         | g kg <sup>-1</sup> | 0.7±0.4 | 0.5±0.3 | 0.4±0.3 | 1.6±1.1   | 1.3±0.8 | 1.1±0.6 |
| Ca        | g kg <sup>-1</sup> | 15±13   | 17±14   | 17±14   | 28±7      | 28±7    | 28±8    |
| Mg        | g kg <sup>-1</sup> | 1.2±0.7 | 1.2±0.8 | 1.2±0.8 | 2.6±0.8   | 2.5±0.8 | 2.4±0.7 |

1089

1090

**Table S8: Summary of soil water characteristics in the study sites (mean±SD).**

| Parameter                     | Unit               | Drained   |           |           | Undrained  |         |
|-------------------------------|--------------------|-----------|-----------|-----------|------------|---------|
|                               |                    | EE        | LT        | LV        | LT         | LV      |
| pH                            | unit               | 6.9±0.6   | 6.5±0.6   | 6.1±1.2   | 7±0.5      | 7±0.5   |
| DOC                           | mg L <sup>-1</sup> | 69.4±23.1 | 93.5±64.5 | 95.4±57.4 | 103.3±23.7 | 41.7±30 |
| N                             | mg L <sup>-1</sup> | 13.2±11.5 | 12.7±15.4 | 5.4±4.7   | 5.5±1.7    | 2.1±1.4 |
| NH <sub>4</sub> <sup>+</sup>  | mg L <sup>-1</sup> | 0.6±0.9   | 0.5±0.7   | 0.4±0.4   | 0.7±0.9    | 0.6±0.7 |
| NO <sub>3</sub> <sup>-</sup>  | mg L <sup>-1</sup> | 11.5±12.9 | 10.7±17.4 | 2.5±4.3   | 1.3±1.6    | 0.5±0.5 |
| PO <sub>4</sub> <sup>3-</sup> | mg L <sup>-1</sup> | 0.1±0.1   | 0.1±0.2   | 0.1±0.2   | 0.1±0.1    | 0.1±0.1 |
| K                             | mg L <sup>-1</sup> | 0.4±0.3   | 2.8±3.5   | 0.6±0.4   | 1.9±0.7    | 0.6±0.3 |
| Ca                            | mg L <sup>-1</sup> | 63.6±27.8 | 77.7±51   | 27.5±16.9 | 71.1±15.5  | 29±9.2  |
| Mg                            | mg L <sup>-1</sup> | 7.5±4.9   | 14.6±8.2  | 5.6±4.6   | 12.9±2.2   | 6±1.4   |

1091

1092

1093 **Table S9: Characteristics of linear mixed-effects models predicting total forest floor respiration (Rtot) incorporating a random effect**  
1094 **for study site.** AIC - Akaike information criterion, BIC - Bayesian information criterion, logLik - log-likelihood value, R<sup>2</sup> marginal -  
1095 variance explained by fixed effects, R<sup>2</sup> conditional - variance explained by fixed and random effects, \*p<0.1, \*\*p<0.05, \*\*\*p<0.01.

| Variable                    | Coefficient ± standard error |               |               |               |               |
|-----------------------------|------------------------------|---------------|---------------|---------------|---------------|
| (Intercept)                 | 3,8±0,12***                  | 3,43±0,16***  | 3,2±0,36***   | 3,42±0,34***  | 3,61±1,25***  |
| T                           | 0,35±0***                    | 0,35±0***     | 0,35±0***     | 0,35±0***     | 0,35±0***     |
| Drainage: undrained         | -1,09±0,22***                | -1,31±0,24*** | -1,35±0,24*** | -1,41±0,22*** | -1,4±0,19***  |
| K                           |                              | -0,6±0,21***  | -0,58±0,23    | -0,4±0,26     | -0,48±0,21    |
| Mg                          |                              | 0,38±0,11***  | 0,43±0,13***  | 0,36±0,13***  | 0,12±0,11     |
| P                           |                              | 0,23±0,11     | 0,26±0,11     | 0,11±0,11     | 0,02±0,11     |
| Species: birch              |                              |               | 0,08±0,25     | -0,08±0,23    | -0,64±0,22*** |
| Species: pine               |                              |               | 0,26±0,34     | -0,25±0,36    | -0,34±0,32    |
| Species: spruce             |                              |               | 0,14±0,25     | -0,19±0,26    | -0,67±0,22*** |
| Country: LT                 |                              |               |               | -0,19±0,28    | 0,23±0,33     |
| Country: LV                 |                              |               |               | 0,38±0,2      | 1,2±0,26***   |
| pH                          |                              |               |               |               | 0,01±0,17     |
| Corg                        |                              |               |               |               | 0±0           |
| N                           |                              |               |               |               | -0,01±0,02    |
| Ca                          |                              |               |               |               | 0,03±0,01     |
| BA                          |                              |               |               |               | -0,01±0,01    |
| A                           |                              |               |               |               | 0±0           |
| AIC                         | 10177                        | 10167         | 10172         | 10170         | 10164         |
| BIC                         | 10208                        | 10215         | 10239         | 10249         | 10279         |
| logLik                      | -5084                        | -5075         | -5075         | -5072         | -5063         |
| R <sup>2</sup> marginal     | 0,75                         | 0,77          | 0,77          | 0,77          | 0,78          |
| R <sup>2</sup> _conditional | 0,79                         | 0,79          | 0,78          | 0,78          | 0,78          |

1096

**Table S10: Mean estimated annual cumulative total respiration (t CO<sub>2</sub>-C ha<sup>-1</sup> year<sup>-1</sup>) and biomass (t dm. ha<sup>-1</sup>) in the study sites.** Abbreviations: Rtot – total respiration, Rh<sub>et</sub> – heterotrophic respiration, aGV and bGV – aboveground and belowground biomass of herbaceous ground vegetation, respectively, FRP – fine root production, fLF – foliar fine litter, cLF – coarse woody litter; NE – not estimated, NA – biomass not present or in negligible amounts. \*Used as soil CO<sub>2</sub> influx values for soil CO<sub>2</sub> balance estimation; \*\* assuming 100% moss cover.

| Study site | Rtot      | Rhet       | aGV*      | bGV*      | Shrubs    | FRP*      | Moss**    | Moss production** | fLF*      | cLF       |
|------------|-----------|------------|-----------|-----------|-----------|-----------|-----------|-------------------|-----------|-----------|
| EEC104     | 6.04      | 7.62       | 0.93      | NE        | 0.08      | NE        | 7.20      | 1.24              | 3.80      | 1.30      |
| EEC105     | 4.76      | 9.48       | 1.10      | NE        | 0.07      | NE        | 5.63      | 1.08              | 3.31      | 1.72      |
| EEC106     | 6.07      | 7.95       | 0.38      | NE        | 0.43      | NE        | 3.61      | 1.11              | 3.63      | 1.51      |
| EEC108     | 5.08      | 12.77      | 0.83      | NE        | 0.73      | NE        | NE        | 0.92              | 4.44      | 1.88      |
| EEC109     | 7.61      | 10.36      | 0.70      | NE        | 0.51      | NE        | 2.75      | 0.26              | 3.12      | 0.53      |
| LTC104     | 3.92      | -          | NA        | 5.11      | 2.72      | 5.00      | 5.93      | 2.08              | 3.77      | 0.62      |
| LTC105     | 6.45      | -          | 2.19      | 4.10      | NA        | 1.29      | NA        | NA                | 3.19      | 0.13      |
| LTC106     | 7.59      | -          | 0.50      | 3.52      | 1.35      | 1.25      | NA        | NA                | 4.15      | 0.25      |
| LTC108     | 2.98      | -          | 3.49      | 1.69      | 2.37      | NE        | 0.96      | NE                | 4.37      | 1.87      |
| LTC109     | 4.04      | -          | 5.78      | 2.91      | 6.18      | NE        | NA        | NA                | 2.20      | 0.83      |
| LVC104     | 6.59      | 12.45      | 2.60      | 0.72      | NE        | 2.10      | NE        | 0.35              | 4.09      | 0.03      |
| LVC105     | 9.01      | 15.78      | 2.47      | 1.43      | NE        | 1.40      | NE        | 0.74              | 4.03      | 0.45      |
| LVC106     | 10.50     | 18.03      | 3.23      | 1.83      | NE        | 2.96      | NE        | 1.68              | 2.76      | 0.44      |
| LVC107     | 5.36      | 7.57       | 1.49      | 3.02      | NE        | 5.57      | NE        | NA                | 3.98      | 1.08      |
| LVC108     | 7.25      | 17.25      | 1.82      | 2.19      | NE        | 0.94      | NE        | 1.20              | 2.67      | 0.35      |
| LVC109     | 6.89      | 13.72      | 1.12      | 1.36      | NE        | 0.64      | NE        | NA                | 3.33      | 1.52      |
| LVC110     | 5.43      | 13.92      | 1.12      | 2.43      | NE        | 2.89      | NE        | 0.32              | 4.00      | 1.33      |
| LVC111     | 5.51      | 17.42      | 0.82      | 2.38      | NE        | 1.51      | NE        | 1.18              | 3.11      | 0.47      |
| LVC112     | 6.60      | 12.50      | 1.67      | 3.11      | NE        | NE        | NE        | NA                | 1.52      | 0.27      |
| LVC115     | 6.61      | 10.76      | 1.44      | 2.48      | NE        | 1.92      | NE        | NA                | 2.57      | 0.86      |
| LVC116     | 5.65      | 11.66      | 3.22      | 6.12      | NE        | NE        | NE        | 1.06              | 1.42      | 0.34      |
| LVC308     | 6.27      | 7.72       | 3.15      | 1.36      | NE        | NE        | NE        | 0.75              | 1.85      | 0.33      |
| LVC309     | 3.98      | 12.90      | 1.61      | 3.29      | NE        | NE        | NE        | NA                | 2.09      | 0.33      |
| LVC311     | 4.57      | 18.30      | 1.51      | 3.69      | NE        | NE        | NE        | NA                | 1.68      | 0.24      |
| LVC312     | 5.27      | 9.49       | 2.14      | 1.62      | NE        | NE        | NE        | 0.83              | 0.94      | 0.21      |
| LVC313     | 4.96      | 11.11      | 3.98      | 3.08      | NE        | NE        | NE        | NA                | 2.96      | 0.45      |
| Drained    | 6.21±0.43 | 11.68±1.72 | 1.82±0.52 | 2.89±0.85 | 0.84±0.45 | 2.53±0.77 | 5.02±0.87 | 0.98±0.25         | 3.22±0.44 | 0.73±0.27 |
| Undrained  | 4.38±1.20 | 14.37±3.97 | 2.35±1.61 | 2.42±0.84 | 4.27±2.5  | 1.08±0.57 | NE        | 1.01±0.23         | 2.53±1.06 | 0.78±0.62 |

**Table S11: Summary of soil CO<sub>2</sub> balance (mean±CI, t CO<sub>2</sub>-C ha<sup>-1</sup> year<sup>-1</sup>) estimation results.** As soil CO<sub>2</sub> influx only ground vegetation, fine roots of trees and foliar fine litter is considered. Soil CO<sub>2</sub> balance is calculated by subtracting mean Rhet' from mean soil CO<sub>2</sub> influx.

| Drainage status | Country | Tree specie | Soil CO <sub>2</sub> input | Rtot      | Rhet'     | Soil CO <sub>2</sub> balance |
|-----------------|---------|-------------|----------------------------|-----------|-----------|------------------------------|
| Drained         | EE      | Mean        | 5.33±3.03                  | 5.91±1.38 | 3.91±1.08 | 1.42±3.22                    |
|                 | LT      |             | 6.06±3.33                  | 5.99±4.66 | 3.97±3.63 | 2.09±4.93                    |
|                 | LV      |             | 5.28±0.86                  | 6.75±1.12 | 4.56±0.87 | 0.72±1.22                    |
|                 | Mean    |             | 5.56±3.35                  | 6.22±4.9  | 4.15±0.89 | 1.41±1.70                    |
|                 | Mean    | Alder       | 5.01±2.06                  | 6.34±2.45 | 4.24±1.91 | 0.77±2.81                    |
|                 |         | Birch       | 4.44±0.9                   | 6.8±0.77  | 4.60±0.60 | -0.16±1.08                   |
|                 |         | Pine        | 6.75±1.92                  | 5.23±0.45 | 3.38±0.35 | 3.37±1.95                    |
|                 |         | Spruce      | 5.41±1.57                  | 6.99±1.98 | 4.75±1.54 | 0.66±2.20                    |
|                 |         | Mean        | 5.4±0.82                   | 6.34±1.81 | 4.24±0.98 | 1.16±2.44                    |
| Undrained       | LT      | Mean        | 5.73±1.73                  | 3.51±1.04 | 2.04±0.81 | 3.69±1.91                    |
|                 | LV      |             | 3.69±1.04                  | 5.24±1.37 | 3.39±1.07 | 0.30±1.49                    |
|                 | Mean    |             | 4.71±0.68                  | 4.38±0.33 | 2.72±1.32 | 2.00±3.32                    |
|                 | Mean    | Alder       | 4.57±1.25                  | 5.47±2.80 | 3.56±2.18 | 1.01±2.51                    |
|                 |         | Birch       | 4.84±2.49                  | 4.25±2.48 | 2.61±1.93 | 2.23±3.15                    |
|                 |         | Spruce      | 3.7±1.22                   | 4.6±1.60  | 2.89±0.57 | 0.81±1.35                    |
|                 |         | Mean        | 4.37±1.81                  | 4.77±2.49 | 3.02±1.21 | 1.35±1.91                    |

S3. Supplementary figures

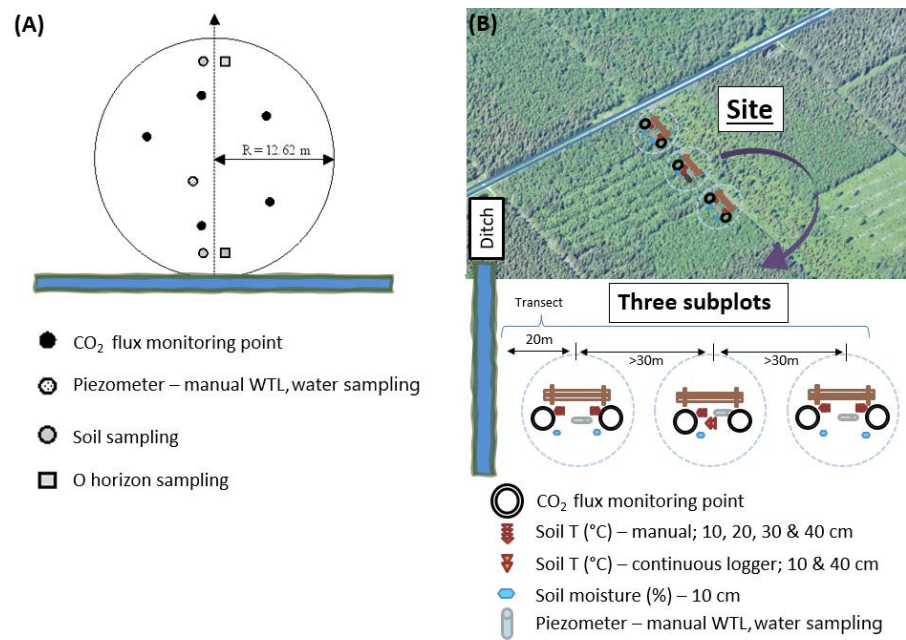

Figure S1: Sampling design.

10

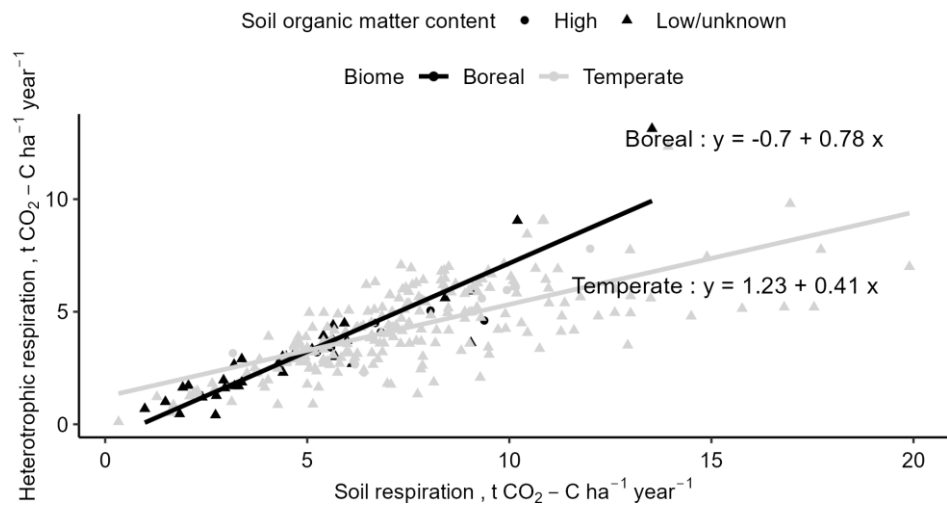

Figure S2: Relationship between total soil respiration and soil heterotrophic respiration in forests according to previous studies (Jian, J. et al., 2021).

15

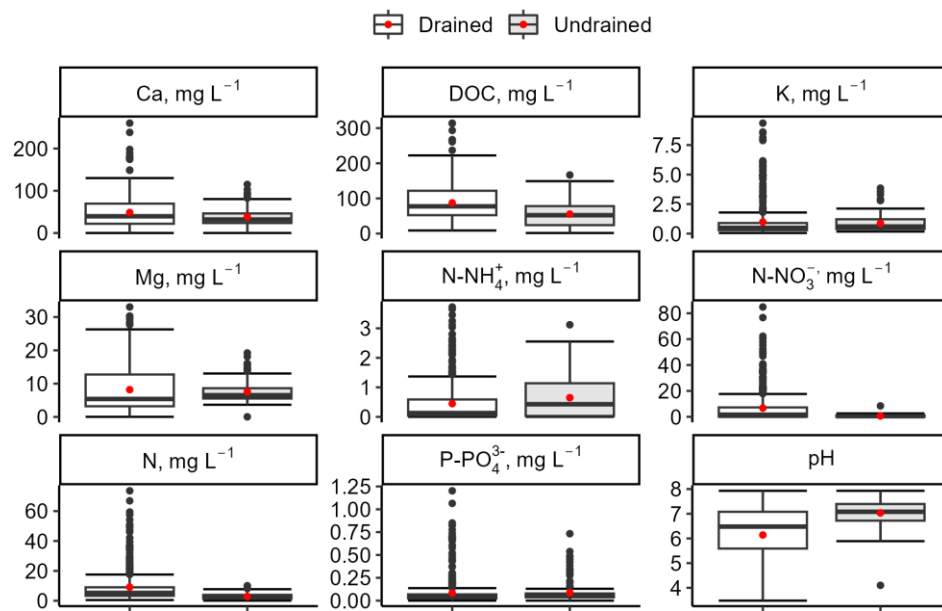

Figure S3: Variation of soil water chemical properties.

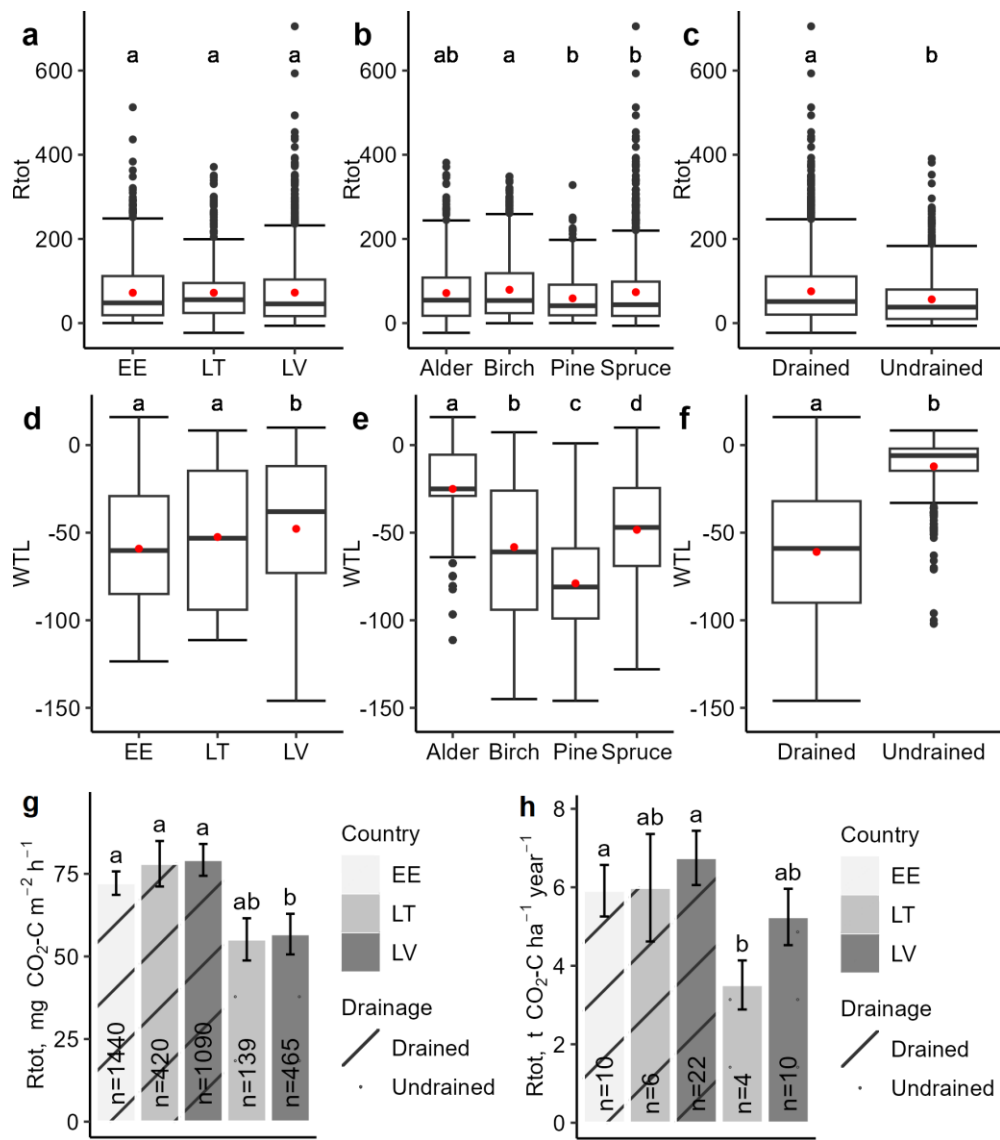

**Figure S4: Summary of water table level (WTL, cm) depth and total respiration (R<sub>tot</sub>, mg CO<sub>2</sub>-C m<sup>-2</sup> h<sup>-1</sup>) measurement results by country (a, d), dominant tree species (b, e) or drainage status (c, f), and mean measured (g) or annualized (h) total respiration stratified by both country and drainage status.**



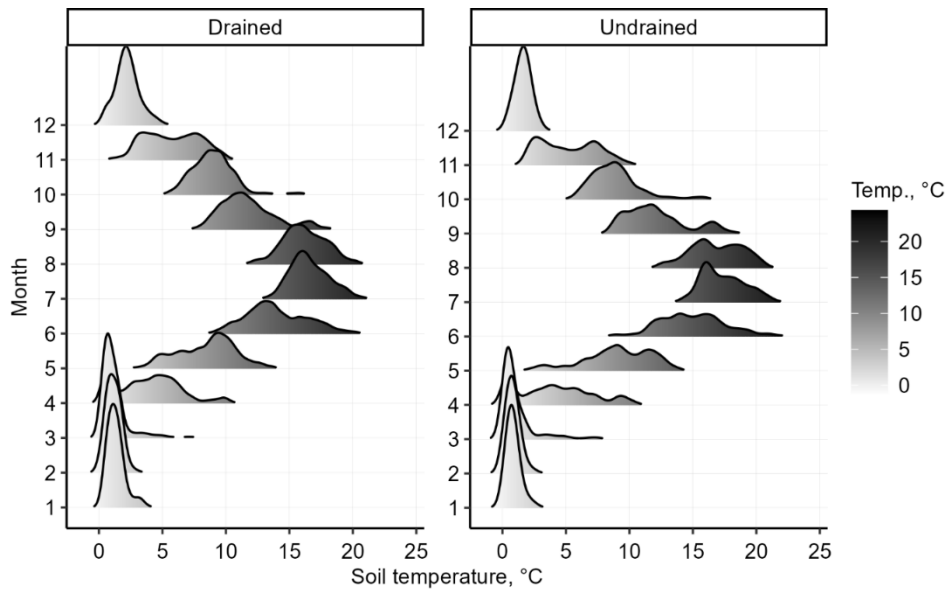

Figure S5: Density plots of soil temperature at 10 cm depth.

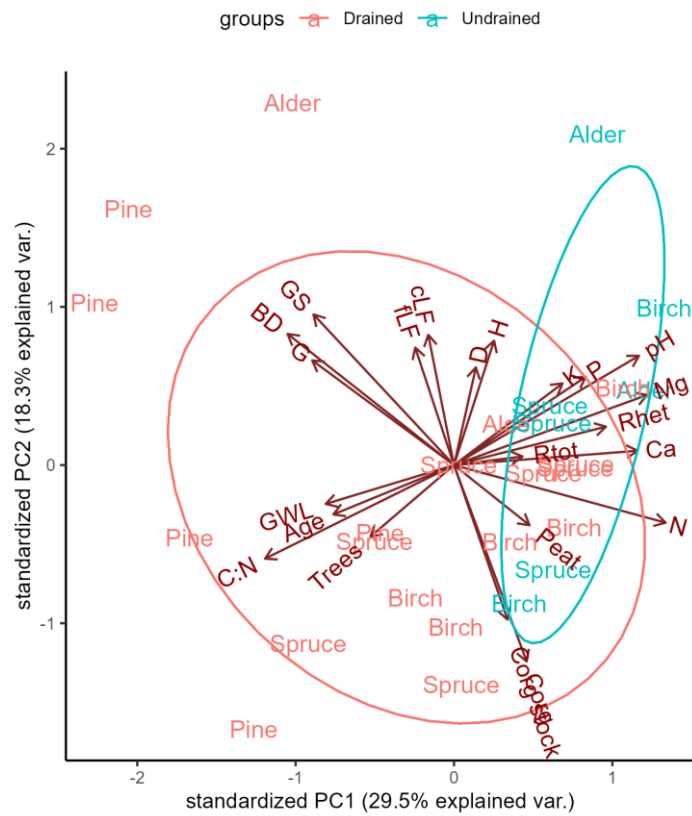

Figure S6: PCA visualizing the covariation of the measured variables. Abbreviations: Age – stand age; BD – bulk density; C:N – ratio between organic carbon and nitrogen in soil; cLF – coarse woody litter; Corg stock – soil organic carbon stock; D – mean tree diameter; fLF – fine foliar litter; G – basal area; GS – growing stock; GWL – water table level; H – mean tree height; pH – soil pH value; Rhet – annual soil heterotrophic respiration; Rtot – annual total forest floor respiration; Trees – tree density; K, Ca, Mg, P, and Corg represent the content of potassium, calcium, magnesium, phosphorus, and organic carbon in the soil, respectively.

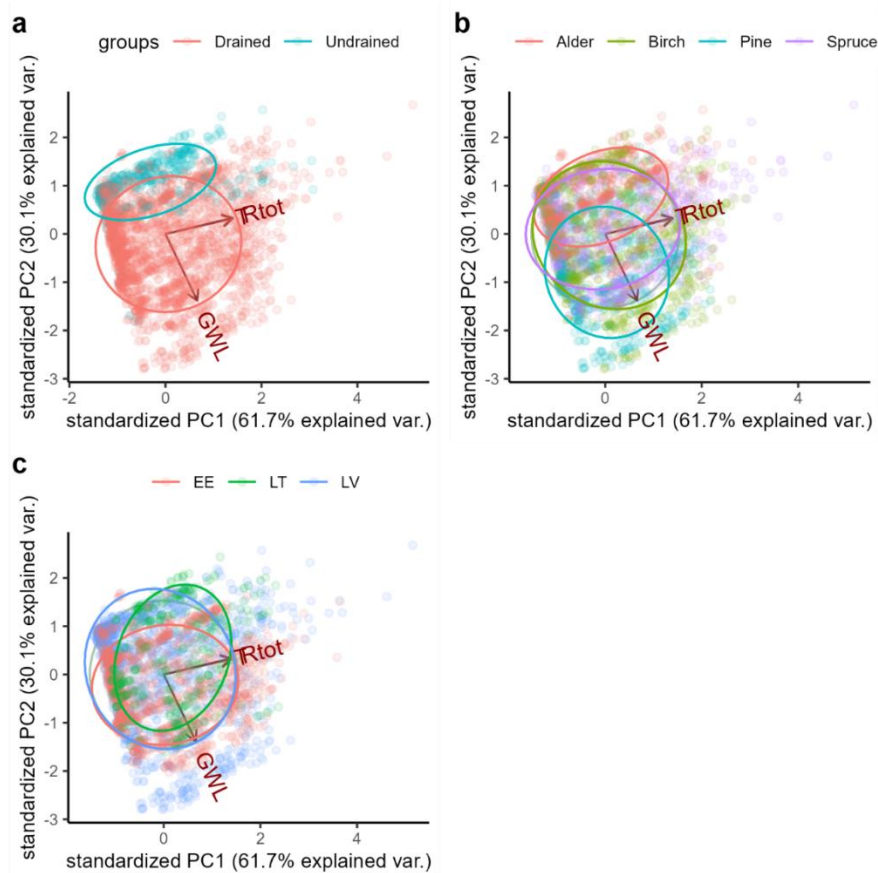

**Figure S7: PCA of total forest floor respiration (Rtot), soil temperature and WTL data.** In figures a, b, c data are grouped by drainage status, dominant tree species and country, respectively.

45

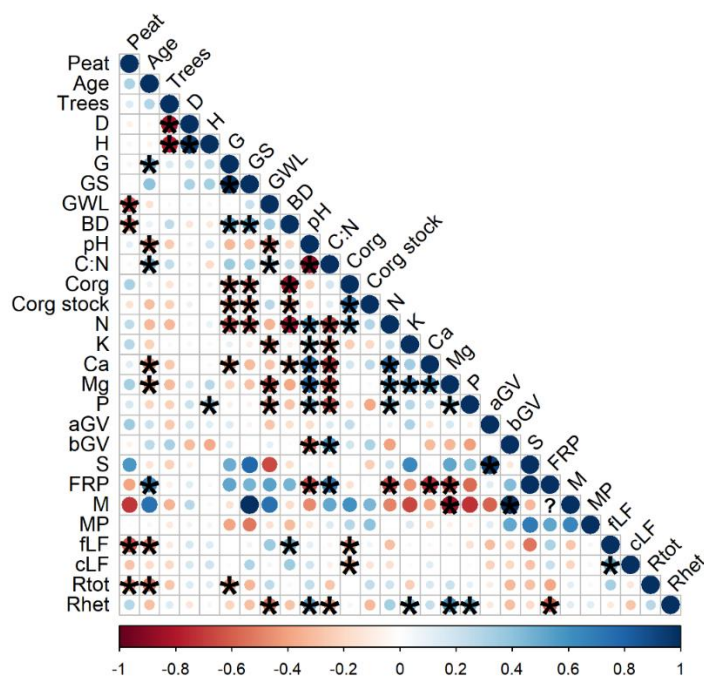

**Figure S8: Correlation matrix of annualized data (soil physical and chemical parameters at 0-30 cm depth).** Abbreviations: Peat – peat (organic) layer depth; Age – stand age; Trees – tree density; D – mean tree diameter; H – mean tree height; G – basal area; GS – growing stock; GWL – water table level; BD – bulk density; pH – soil pH value; C:N – ratio between organic carbon and nitrogen in soil; Corg stock – soil organic carbon stock; K, Ca, Mg, P, and Corg represent the content of potassium, calcium, magnesium, phosphorus, and organic carbon in the soil, respectively; aGV, bGV, S, FRP, M, MP, fLF, cLF – biomass of aboveground herbaceous vegetation, belowground herbaceous vegetation, shrubs, tree fine root production, moss, moss production, fine foliar litter, coarse woody litter, respectively; Rtot – annual total forest floor respiration ; Rhel – annual soil heterotrophic respiration.

50

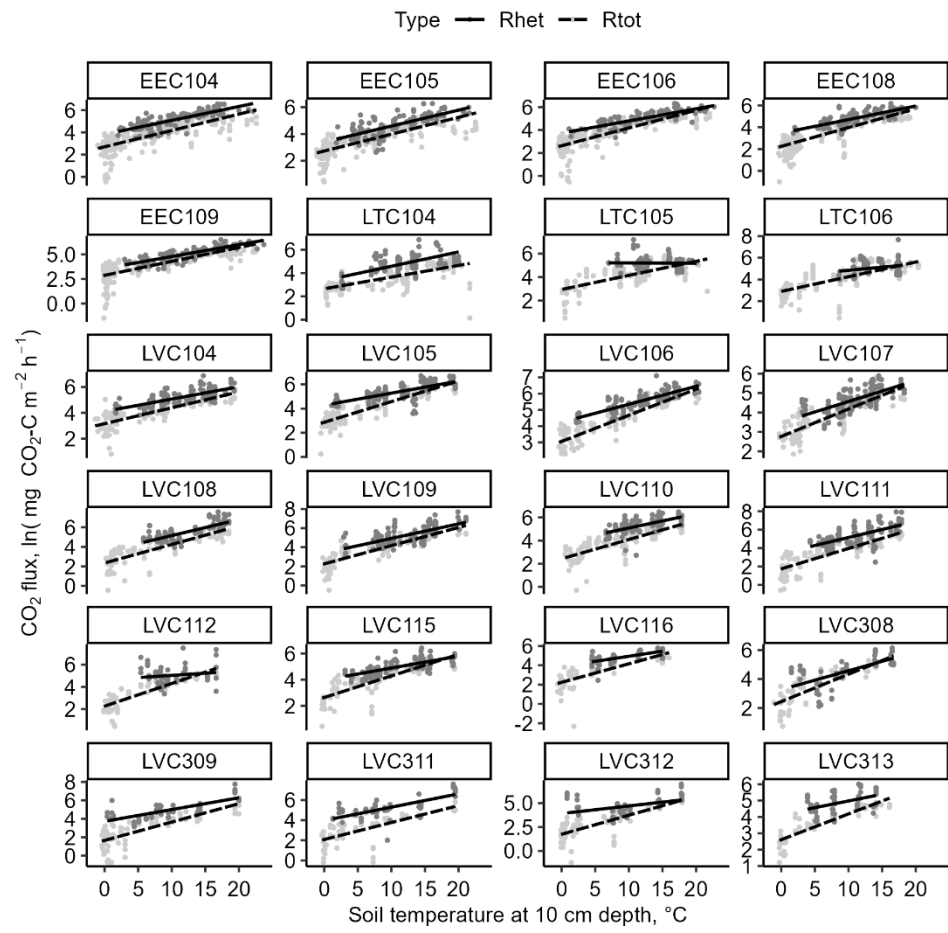

**Figure S9: Relationship between soil temperature and log-transformed soil heterotrophic (Rhet) and total (Rtot) respiration.**
